# Supplementary material
Source: MDPI journal article supplement (https://www.mdpi.com/1424-2818/14/2/127)
Supplement: s1 [file s1]

Supplementary Material for the paper “ Diversity of rotifers in small rivers affected by human activity” by Dariusz Halabowski, Irena Bielańska-Grajner, Iga Lewin and Agnieszka Sowa

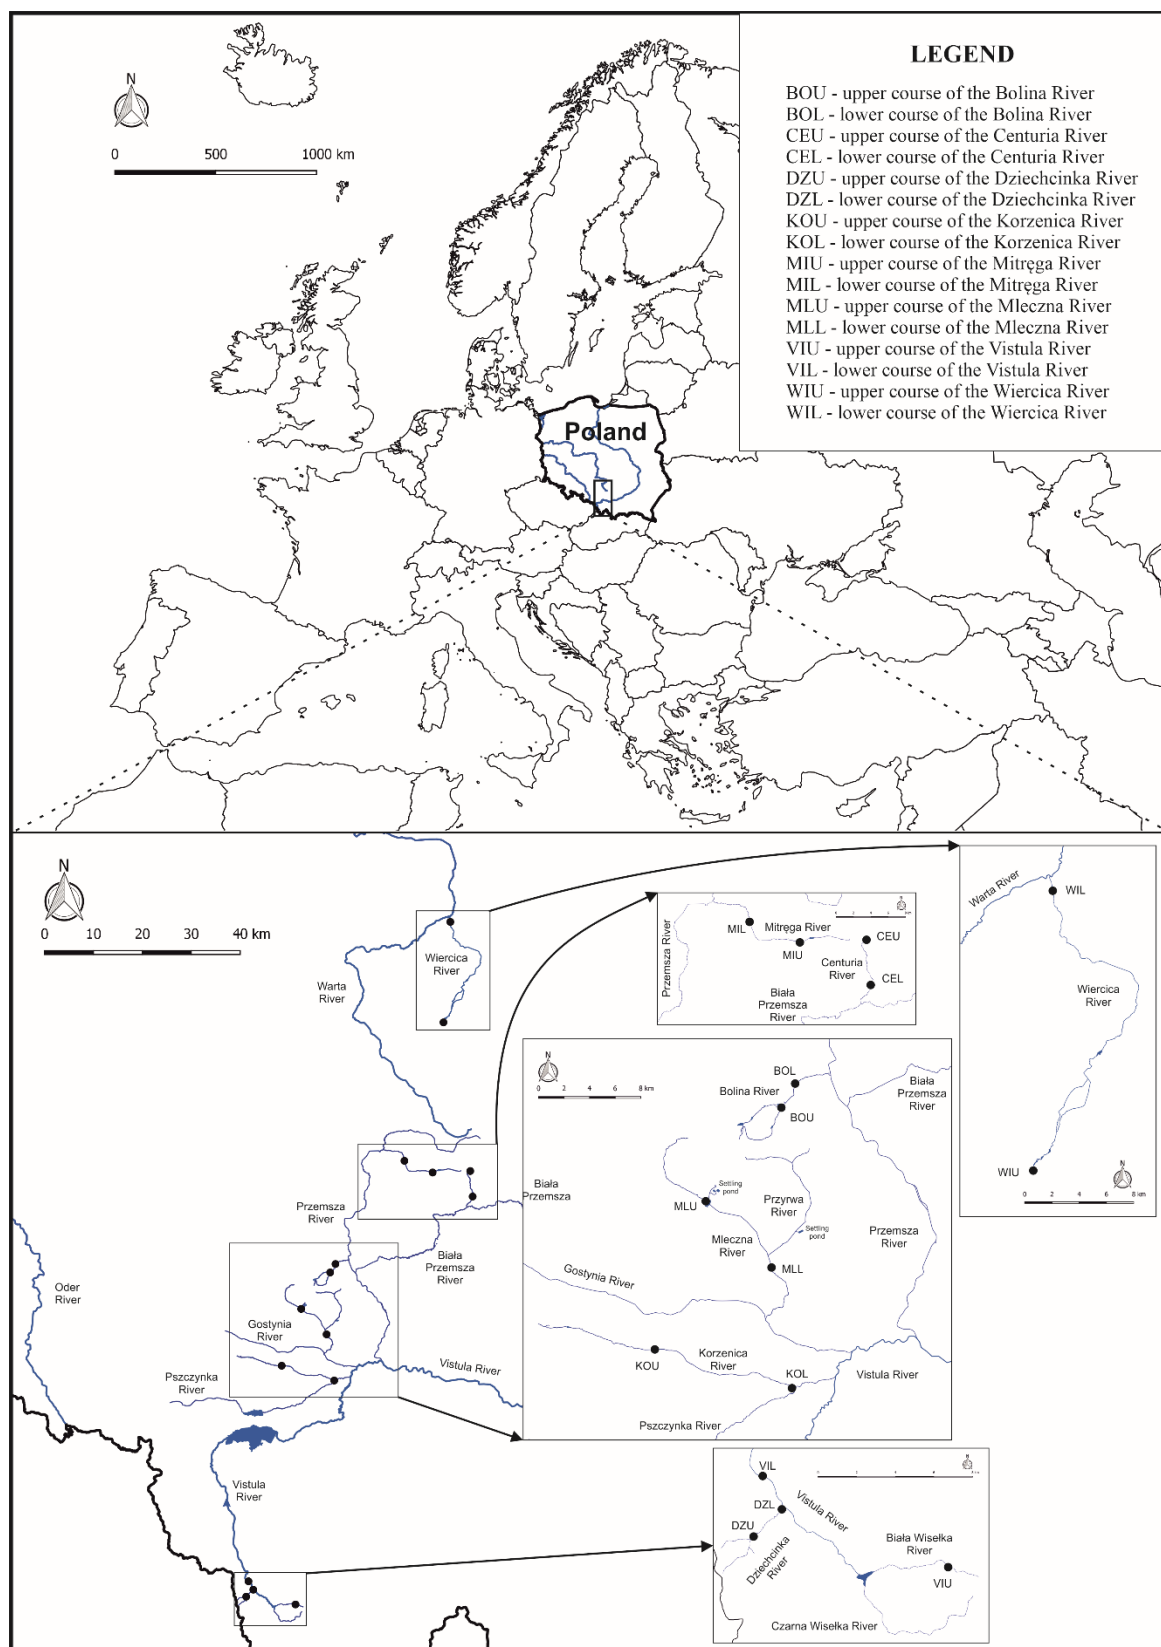

Figure S1. Study area and sampling sites.

**Table S1.** The physical and chemical parameters of the water of the studied rivers (ranges) and the results of the Kruskal-Wallis one-way ANOVA and Dunn's multiple comparison post hoc tests (superscript <sup>a, b, c, d, e, f, g, h</sup> denotes significant differences between the rivers).

| Parameter                                               | Bolina                           | Centuria                   | Mitřęga                    | Mleczna                      | Dziehcinka                  | Vistula                    | Korzenica                    | Wiercica                    | H value | p value |
|---------------------------------------------------------|----------------------------------|----------------------------|----------------------------|------------------------------|-----------------------------|----------------------------|------------------------------|-----------------------------|---------|---------|
| Altitude [m a.s.l.]                                     | 257-262 <sup>e,f</sup>           | 311-343 <sup>g</sup>       | 300-317                    | 236-248 <sup>e,f</sup>       | 420-544 <sup>a,d,g,h</sup>  | 415-748 <sup>a,d,g,h</sup> | 234-242 <sup>b,e,f</sup>     | 215-309 <sup>e,f</sup>      | 54.106  | <0.001  |
| Width of the riverbed [m]                               | 4.41-7.78 <sup>g</sup>           | 3.30-5.95                  | 2.87-6.13 <sup>h</sup>     | 4.41-9.36 <sup>g</sup>       | 3.49-4.55 <sup>h</sup>      | 3.47-19.80 <sup>g</sup>    | 1.85-4.06 <sup>a,d,f,h</sup> | 5.97-12.05 <sup>c,e,g</sup> | 37.858  | <0.001  |
| Depth of the riverbed [cm]                              | 21.38-34.40 <sup>d</sup>         | 9.75-58.60                 | 40.00-61.25                | 36.80-109.17 <sup>a,e</sup>  | 19.30-31.60 <sup>d</sup>    | 26.17-57.60                | 38.26-85.00                  | 6.70-98.33                  | 25.064  | <0.001  |
| Flow velocity [m s <sup>-1</sup> ]                      | 0.060-0.510                      | 0.071-0.790                | 0.007-0.292 <sup>f</sup>   | 0.099-0.384 <sup>f</sup>     | 0.229-0.825 <sup>c,d</sup>  | 0.107-0.939                | 0.057-0.706                  | 0.119-0.376                 | 24.218  | 0.001   |
| Dissolved oxygen [mg dm <sup>-3</sup> ]                 | 4.65-9.69                        | 4.24-6.61                  | 3.18-6.12                  | 0.69-6.78                    | 4.96-5.77                   | 4.88-5.90                  | 2.98-6.49                    | 4.40-6.03                   | 17.032  | 0.017   |
| Temperature [°C]                                        | 15.5-29.1 <sup>b,e,f</sup>       | 7.5-14.3 <sup>a</sup>      | 9.4-19.1                   | 14.8-25.1                    | 9.1-23.6 <sup>a</sup>       | 9.2-23.8 <sup>a</sup>      | 13.4-23.5                    | 9.7-19.8                    | 27.415  | <0.001  |
| Salinity [PSU]                                          | 6.57-33.55 <sup>b,e,f,g,h</sup>  | 0.19-0.28 <sup>a</sup>     | 0.28-0.35 <sup>e,f</sup>   | 0.45-5.16 <sup>e,f</sup>     | 0.04-0.05 <sup>a,c,d</sup>  | 0.02-0.07 <sup>a,c,d</sup> | 0.17-0.28 <sup>a</sup>       | 0.22-0.25 <sup>a</sup>      | 57.933  | <0.001  |
| EC [ $\mu$ S cm <sup>-1</sup> ]                         | 9130-46 600 <sup>b,e,f,g,h</sup> | 250-360 <sup>a</sup>       | 360-460 <sup>e,f</sup>     | 620-7160 <sup>e,f</sup>      | 50-70 <sup>a,c,d</sup>      | 30-90 <sup>a,c,d</sup>     | 220-370 <sup>a</sup>         | 280-330 <sup>a</sup>        | 57.933  | <0.001  |
| TDS [mg dm <sup>-3</sup> ]                              | 4570-23 300 <sup>b,e,f,g,h</sup> | 110-180 <sup>a</sup>       | 170-220 <sup>e,f</sup>     | 300-3570 <sup>e,f</sup>      | 20-30 <sup>a,c,d</sup>      | 10-30 <sup>a,c,d</sup>     | 100-170 <sup>a</sup>         | 140-160 <sup>a</sup>        | 58.110  | <0.001  |
| Chlorides [mg dm <sup>-3</sup> ]                        | 2823-17 028 <sup>b,e,f,h</sup>   | 8-20 <sup>a</sup>          | 15-26 <sup>f</sup>         | 62-1970 <sup>e,f,h</sup>     | 4-9 <sup>a,d,g</sup>        | 5-9 <sup>a,c,d,g</sup>     | 18-25 <sup>e,f</sup>         | 4-17 <sup>a,d</sup>         | 56.707  | <0.001  |
| Sulphates [mg dm <sup>-3</sup> ]                        | 320-770 <sup>e,f,h</sup>         | 35-44                      | 22-66 <sup>f</sup>         | 74-272 <sup>e,f,h</sup>      | 10-18 <sup>a,d</sup>        | 8-16 <sup>a,c,d</sup>      | 31-64                        | 10-16 <sup>a,d</sup>        | 57.548  | <0.001  |
| Total hardness [mg CaCO <sub>3</sub> dm <sup>-3</sup> ] | 1071.60-4857.92 <sup>e,f,g</sup> | 160.00-300.00 <sup>f</sup> | 160-330 <sup>e,f</sup>     | 255-560 <sup>e,f,g</sup>     | 36-68 <sup>a,c,d</sup>      | 28-67 <sup>a,b,c,d</sup>   | 110-150 <sup>a,d</sup>       | 145-320                     | 57.623  | <0.001  |
| Magnesium [mg dm <sup>-3</sup> ]                        | 124.00-670.00 <sup>e,f,h</sup>   | 1.94-27.55                 | 0.06-32.55                 | 16.31-62-53 <sup>e,f,h</sup> | 0.26-5.14 <sup>a,d</sup>    | 0.04-3.38 <sup>a,d</sup>   | 5.04-13.77                   | 0.00-19.80 <sup>a,d</sup>   | 46.606  | <0.001  |
| Calcium [mg dm <sup>-3</sup> ]                          | 328-1310 <sup>e,f,g</sup>        | 55-76                      | 64-94 <sup>e,f</sup>       | 40-158 <sup>e,f</sup>        | 14-21 <sup>a,c,d</sup>      | 10-18 <sup>a,c,d,h</sup>   | 24-50 <sup>a</sup>           | 58-82 <sup>f</sup>          | 56.170  | <0.001  |
| Alkalinity [mg CaCO <sub>3</sub> dm <sup>-3</sup> ]     | 230.0-380.0 <sup>b,e,f,g</sup>   | 75.0-165.0 <sup>a</sup>    | 125.0-250.0 <sup>e,f</sup> | 125.0-275.0 <sup>e,f</sup>   | 2.5-50.0 <sup>a,c,d,h</sup> | 15-40 <sup>a,c,d,h</sup>   | 20-155 <sup>a</sup>          | 140-180 <sup>e,f</sup>      | 55.733  | <0.001  |
| pH                                                      | 7.5-7.9                          | 7.2-7.9                    | 7.0-8.1                    | 6.8-8.0                      | 6.5-8.3                     | 6.5-8.4                    | 6.2-7.7                      | 7.4-8.2                     | 9.087   | 0.247   |

|                                   |                        |                        |                          |                          |                            |                            |                      |                          |        |        |
|-----------------------------------|------------------------|------------------------|--------------------------|--------------------------|----------------------------|----------------------------|----------------------|--------------------------|--------|--------|
| Nitrates [mg dm <sup>-3</sup> ]   | 0.00-79.74             | 0.00-20.82             | 0.89-15.95               | 5.32-10.19               | 0.00-7.38                  | 0.00-9.30                  | 0.44-18.61           | 0.89-8.42                | 16.165 | <0.024 |
| Nitrites [mg dm <sup>-3</sup> ]   | 0.675-9.96<br>e,f,h    | 0.00-0.15 <sup>a</sup> | 0.03-0.31                | 0.20-0.93 <sup>e,f</sup> | 0.00-0.00 <sup>a,d</sup>   | 0.00-0.01 <sup>a,d</sup>   | 0.00-0.59            | 0.00-0.38 <sup>a</sup>   | 48.921 | <0.001 |
| Ammonium [mg dm <sup>-3</sup> ]   | 0.619-12.12<br>b,e,f,h | 0.00-0.29 <sup>a</sup> | 0.26-1.42 <sup>e</sup>   | 0.23-1.21 <sup>e,h</sup> | 0.13-0.29 <sup>a,c,d</sup> | 0.15-0.45 <sup>a</sup>     | 0.22-0.63            | 0.00-0.24 <sup>a,d</sup> | 46.240 | <0.001 |
| Phosphates [mg dm <sup>-3</sup> ] | 0.02-0.14 <sup>d</sup> | 0.00-0.11 <sup>d</sup> | 0.08-0.39                | 0.16-19.20<br>a,b,e,f    | 0.00-1.52 <sup>e</sup>     | 0.00-0.34 <sup>e</sup>     | 0.09-0.87            | 0.00-0.66                | 28.030 | <0.001 |
| Iron [mg dm <sup>-3</sup> ]       | 0.12-0.88              | 0.03-0.65 <sup>g</sup> | 0.25-1.00 <sup>e,f</sup> | 0.26-1.46 <sup>e,f</sup> | 0.03-0.34 <sup>c,d,g</sup> | 0.03-0.23 <sup>c,d,g</sup> | 0.42-3.11<br>b,e,f,h | 0.03-0.72 <sup>g</sup>   | 37.793 | <0.001 |

<sup>a</sup> – the Bolina River, <sup>b</sup> – the Centuria River, <sup>c</sup> – the Mitrega River, <sup>d</sup> – the Mleczna River, <sup>e</sup> – the Dziehcinka River, <sup>f</sup> – the Vistula River, <sup>g</sup> – the Korzenica River, <sup>h</sup> – the Wiercica River

**Table S2.** The physical and chemical parameters of the water of sampling sites (ranges) and the results of the Kruskal-Wallis one-way ANOVA and Dunn's multiple comparison post hoc tests (superscript <sup>a, b, c, d, e, f, g, h</sup> denotes significant differences among the rivers). Abbreviations: UC – upper course, LC – lower course.

| Parameter                                               | Bolina                           |                                  | Centuria                  |             | Mitrega     |                          | Mleczna                |                             | Dziechcinka              |                          | Vistula                      |                                | Korzenica                      |                        | Wiercica                  |                            | H value | p value |
|---------------------------------------------------------|----------------------------------|----------------------------------|---------------------------|-------------|-------------|--------------------------|------------------------|-----------------------------|--------------------------|--------------------------|------------------------------|--------------------------------|--------------------------------|------------------------|---------------------------|----------------------------|---------|---------|
|                                                         | UC                               | LC                               | UC                        | LC          | UC          | LC                       | UC                     | LC                          | UC                       | LC                       | UC                           | LC                             | UC                             | LC                     | UC                        | LC                         |         |         |
| Altitude [m a.s.l.]                                     | 262                              | 257                              | 343                       | 311         | 317         | 300 <sup>i,k</sup>       | 248                    | 236                         | 544 <sup>f,n,r</sup>     | 420 <sup>n,r</sup>       | 748 <sup>f,m,n,r</sup>       | 415 <sup>r</sup>               | 242 <sup>k</sup>               | 234 <sup>i,j,k</sup>   | 309                       | 215 <sup>i,j,k,l</sup>     | 63.000  | <0.001  |
| Width of the riverbed [m]                               | 7.24-7.78 <sup>m</sup>           | 4.41-4.45                        | 4.47-5.95                 | 3.30-4.20   | 3.97-6.13   | 2.87-3.39 <sup>l,r</sup> | 4.41-5.31              | 6.26-9.36 <sup>n</sup>      | 4.05-4.55                | 3.49-3.92 <sup>l</sup>   | 3.47-4.01                    | 17.80-19.80 <sup>f,i,m,n</sup> | 1.85-2.51 <sup>a,h,l,o,r</sup> | 2.99-4.06 <sup>l</sup> | 5.97-9.60 <sup>m</sup>    | 9.52-12.05 <sup>f,m</sup>  | 59.410  | <0.001  |
| Depth of the riverbed [cm]                              | 25.20-34.40                      | 21.38-25.90                      | 9.75-22.50 <sup>h,r</sup> | 41.67-58.60 | 40.00-61.25 | 40.00-58.60              | 36.80-62.17            | 81.40-109.17 <sup>c,o</sup> | 21.19-31.60              | 19.30-30.80              | 26.17-30.88                  | 35.30-57.60                    | 38.26-53.00                    | 40.38-85.00            | 6.70-14.58 <sup>h,r</sup> | 76.40-98.33 <sup>c,o</sup> | 56.081  | <0.001  |
| Flow velocity [m s <sup>-1</sup> ]                      | 0.060-0.420                      | 0.400-0.510                      | 0.071-0.173               | 0.404-0.790 | 0.093-0.233 | 0.007-0.292              | 0.100-0.384            | 0.155-0.211                 | 0.229-0.655              | 0.310-0.825              | 0.390-0.939                  | 0.107-0.478                    | 0.057-0.533                    | 0.182-0.706            | 0.136-0.205               | 0.119-0.376                | 38.260  | <0.001  |
| Dissolved oxygen [mg dm <sup>-3</sup> ]                 | 4.65-7.09                        | 5.13-9.69 <sup>h</sup>           | 4.89-6.61                 | 4.24-4.96   | 3.18-5.68   | 4.62-6.12                | 2.48-6.78              | 0.69-4.82 <sup>b</sup>      | 5.11-5.77                | 4.96-5.49                | 4.88-5.24                    | 5.36-5.90                      | 3.96-6.49                      | 2.98-5.49              | 4.40-6.00                 | 4.71-6.03                  | 26.328  | 0.035   |
| Temperature [°C]                                        | 15.7-28.6                        | 15.5-29.1                        | 7.5-13.6                  | 9.5-14.3    | 9.4-19.1    | 10.4-18.4                | 16.5-24.0              | 14.8-25.1                   | 9.8-17.8                 | 9.1-23.6                 | 9.2-18.1                     | 9.4-23.8                       | 13.4-23.5                      | 13.4-22.6              | 9.7-11.3                  | 13.6-19.8                  | 31.570  | 0.007   |
| Salinity [PSU]                                          | 6.57-12.25 <sup>i,j,k</sup>      | 16.34-33.55 <sup>i,j,k,l</sup>   | 0.19-0.21                 | 0.25-0.28   | 0.28-0.31   | 0.29-0.35                | 0.45-0.64 <sup>k</sup> | 2.97-5.16 <sup>i,k</sup>    | 0.05 <sup>a,b,h</sup>    | 0.04-0.05 <sup>a,b</sup> | 0.02-0.04 <sup>a,b,g,h</sup> | 0.05-0.07 <sup>b</sup>         | 0.18-0.28                      | 0.17-0.28              | 0.22-0.25                 | 0.22-0.25                  | 60.291  | <0.001  |
| EC [μS cm <sup>-1</sup> ]                               | 9130-17 020 <sup>i,j,k</sup>     | 22,700-46 600 <sup>i,j,k,l</sup> | 250-270                   | 330-360     | 360-400     | 380-460                  | 620-890 <sup>k</sup>   | 4120-7160 <sup>i,k</sup>    | 50-70 <sup>a,b,h</sup>   | 50-70 <sup>a,b</sup>     | 30-50 <sup>a,b,g,h</sup>     | 70-90 <sup>b</sup>             | 240-370                        | 220-360                | 280-330                   | 280-330                    | 60.291  | <0.001  |
| TDS [mg dm <sup>-3</sup> ]                              | 4570-8510 <sup>i,j,k,l</sup>     | 11 360-23 300 <sup>i,j,k,l</sup> | 110-140                   | 150-180     | 170-190     | 180-220                  | 300-440 <sup>k</sup>   | 2050-3570 <sup>k</sup>      | 20-20 <sup>a,b</sup>     | 20-30 <sup>a,b</sup>     | 10-20 <sup>a,b,g,h</sup>     | 20-30 <sup>a,b</sup>           | 110-170                        | 100-170                | 140-160                   | 140-160                    | 60.328  | <0.001  |
| Chlorides [mg dm <sup>-3</sup> ]                        | 2823-5590 <sup>i,k,l</sup>       | 7528-17 028 <sup>i,j,k,l</sup>   | 8-20                      | 12-17       | 15-22       | 18-26                    | 62-98                  | 1340-1970 <sup>i,k</sup>    | 4-8 <sup>a,b,h</sup>     | 8-9 <sup>b</sup>         | 5-8 <sup>a,b,h</sup>         | 8-9 <sup>b</sup>               | 18-25                          | 18-24                  | 4-16                      | 10-17                      | 57.946  | <0.001  |
| Sulphates [mg dm <sup>-3</sup> ]                        | 352-770 <sup>j,k,l,o,r</sup>     | 320-550 <sup>k,r</sup>           | 35-44                     | 37-40       | 22-54       | 49-66                    | 74-134 <sup>k</sup>    | 200-272 <sup>k</sup>        | 13-17                    | 10-18 <sup>a</sup>       | 8-11 <sup>a,b,g,h</sup>      | 12-16 <sup>a</sup>             | 31-64                          | 35-60                  | 12-14 <sup>a</sup>        | 10-16 <sup>a,b</sup>       | 58.752  | <0.001  |
| Total hardness [mg CaCO <sub>3</sub> dm <sup>-3</sup> ] | 1071.0-1920.0 <sup>i,j,k,l</sup> | 2268.2-4857.9 <sup>i,j,k,l</sup> | 160.0-225.0               | 195.0-300.0 | 160.0-310.0 | 175.0-330.0              | 255.0-430.0            | 405.0-560.0 <sup>k</sup>    | 36.0-63.0 <sup>a,b</sup> | 42.0-68.0 <sup>a,b</sup> | 28.0-41.0 <sup>a,b,h</sup>   | 33.0-67.0 <sup>a,b</sup>       | 125.0-150.0                    | 110.0-135.0            | 150.0-320.0               | 145.0-215.0                | 58.434  | <0.001  |

|                                                     |                              |                                |                        |            |            |            |             |                        |                        |                        |                        |                          |           |                            |                          |            |        |        |
|-----------------------------------------------------|------------------------------|--------------------------------|------------------------|------------|------------|------------|-------------|------------------------|------------------------|------------------------|------------------------|--------------------------|-----------|----------------------------|--------------------------|------------|--------|--------|
| Magnesium [mg dm <sup>-3</sup> ]                    | 124.00-270.00 <sup>l,o</sup> | 225.00-670.00 <sup>k,l,o</sup> | 3.80-21.91             | 1.94-27.55 | 0.06-32.55 | 0.69-30.05 | 16.31-62.53 | 38.19-60.08            | 0.26-5.14              | 0.51-3.89              | 0.26-3.38 <sup>b</sup> | 0.04-2.02 <sup>a,b</sup> | 5.04-8.80 | 10.02-13.77                | 0.01-2.90 <sup>a,b</sup> | 0.00-13.80 | 47.608 | <0.001 |
| Calcium [mg dm <sup>-3</sup> ]                      | 328-687 <sup>i,k,l</sup>     | 548-1310 <sup>ij,k,l</sup>     | 55-60                  | 67-76      | 64-94      | 69-94      | 40-100      | 101-158 <sup>k,l</sup> | 14-18 <sup>a,b</sup>   | 16-21 <sup>b</sup>     | 10-16 <sup>a,b,h</sup> | 11-18 <sup>a,b,h</sup>   | 38-50     | 24-32                      | 59-80                    | 58-82      | 58.833 | <0.001 |
| Alkalinity [mg CaCO <sub>3</sub> dm <sup>-3</sup> ] | 275-380 <sup>ij,k,l</sup>    | 230-320 <sup>i,k,l</sup>       | 75-110                 | 120-165    | 125-165    | 165-250    | 125-240     | 240-275 <sup>i,k</sup> | 3-40 <sup>a,b,h</sup>  | 4-50 <sup>a</sup>      | 15-25 <sup>a,b,h</sup> | 15-40 <sup>a,b</sup>     | 45-155    | 20-70                      | 145-175                  | 140-180    | 58.423 | <0.001 |
| pH                                                  | 7.5-7.8                      | 7.5-7.9                        | 7.5-7.8                | 7.2-7.9    | 7.0-7.4    | 7.3-8.1    | 6.8-7.9     | 7.4-8.0                | 6.5-8.3                | 6.8-8.2                | 6.5-8.4                | 6.9-8.2                  | 7.2-7.7   | 6.2-7.6                    | 7.4-7.7                  | 7.5-8.2    | 16.522 | 0.348  |
| Nitrates [mg dm <sup>-3</sup> ]                     | 0.00-79.74                   | 4.43-10.63                     | 0.00-11.96             | 0.00-20.82 | 2.22-12.40 | 0.89-15.95 | 5.32-7.09   | 5.32-10.19             | 0.00-7.38              | 0.00-2.66              | 0.00-0.89              | 0.00-9.30                | 0.44-6.20 | 2.22-18.61                 | 0.89-3.54                | 4.87-8.42  | 23.315 | 0.078  |
| Nitrites [mg dm <sup>-3</sup> ]                     | 0.68-1.44                    | 2.49-9.96 <sup>c,ij,k,l</sup>  | 0.00-0.01 <sup>b</sup> | 0.01-0.15  | 0.03-0.31  | 0.11-0.24  | 0.28-0.93   | 0.20-0.73              | 0.00-0.00 <sup>b</sup> | 0.00-0.00 <sup>b</sup> | 0.00-0.01 <sup>b</sup> | 0.00-0.00 <sup>b</sup>   | 0.00-0.26 | 0.00-0.59                  | 0.00-0.07                | 0.02-0.38  | 53.490 | <0.001 |
| Ammonium [mg dm <sup>-3</sup> ]                     | 0.62-1.00                    | 1.25-12.12 <sup>c,i,o</sup>    | 0.00-0.23 <sup>b</sup> | 0.17-0.29  | 0.33-1.42  | 0.26-0.36  | 0.34-0.56   | 0.23-1.21              | 0.13-0.18 <sup>b</sup> | 0.13-0.29              | 0.15-0.45              | 0.18-0.27                | 0.22-0.52 | 0.41-0.63                  | 0.00-0.19 <sup>b</sup>   | 0.02-0.24  | 49.924 | <0.001 |
| Phosphates [mg dm <sup>-3</sup> ]                   | 0.02-0.14                    | 0.05-0.10                      | 0.00-0.11              | 0.00-0.10  | 0.08-0.39  | 0.08-0.24  | 0.37-19.20  | 0.16-3.84              | 0.00-0.23              | 0.01-1.52              | 0.00-0.29              | 0.01-0.34                | 0.11-0.56 | 0.09-0.87                  | 0.00-0.21                | 0.20-0.66  | 32.464 | 0.005  |
| Iron [mg dm <sup>-3</sup> ]                         | 0.13-0.88                    | 0.12-0.39                      | 0.03-0.65              | 0.12-0.28  | 0.38-1.00  | 0.25-0.78  | 0.28-0.67   | 0.26-1.46              | 0.03-0.13 <sup>n</sup> | 0.04-0.34              | 0.03-0.18 <sup>n</sup> | 0.09-0.23                | 0.42-0.97 | 0.82-3.11 <sup>i,k,o</sup> | 0.03-0.11 <sup>n</sup>   | 0.35-0.72  | 47.794 | <0.001 |

<sup>a</sup> – upper course of the Bolina River, <sup>b</sup> – lower course of the Bolina River, <sup>c</sup> – upper course of the Centuria River, <sup>d</sup> – lower course of the Centuria River, <sup>e</sup> – upper course of the Mitręga River, <sup>f</sup> – lower course of the Mitręga River, <sup>g</sup> – upper course of the Mleczna River, <sup>h</sup> – lower course of the Mleczna River, <sup>i</sup> – upper course of the Dziechcinka River, <sup>j</sup> – lower course of the Dziechcinka River, <sup>k</sup> – upper course of the Vistula River, <sup>l</sup> – lower course of the Vistula River, <sup>m</sup> – upper course of the Korzenica River, <sup>n</sup> – lower course of the Korzenica River, <sup>o</sup> – upper course of the Wiercica River, <sup>r</sup> – lower course of the Wiercica River
